# Supplementary material for: An Accurate Projector Calibration Method Based on Polynomial Distortion Representation
Source: MDPI journal article supplement (doi:10.3390/s151026567), 2015-10-20
Supplement: s1 [file s1]

*Supplementary Information***An Accurate Projector Calibration Method Based on Polynomial Distortion Representation. *Sensors* 2015, 15, 26567-26582****Miao Liu <sup>1</sup>, Changku Sun <sup>1</sup>, Shujun Huang <sup>2</sup> and Zonghua Zhang <sup>2,\*</sup>**

<sup>1</sup> State Key Laboratory of Precision Measuring Technology and Instruments, Tianjin University, Tianjin 300072, China; E-Mails: [excalibur\\_s@tju.edu.cn](mailto:excalibur_s@tju.edu.cn) (M.L.); [sunck@tju.edu.cn](mailto:sunck@tju.edu.cn) (C.S.)

<sup>2</sup> School of Mechanical Engineering, Hebei University of Technology, Tianjin 300130, China; E-Mail: [huangsj@hebut.edu.cn](mailto:huangsj@hebut.edu.cn)

\* Author to whom correspondence should be addressed; E-Mail: [zhzhang@hebut.edu.cn](mailto:zhzhang@hebut.edu.cn); Tel./Fax: +86-22-2658-2403.

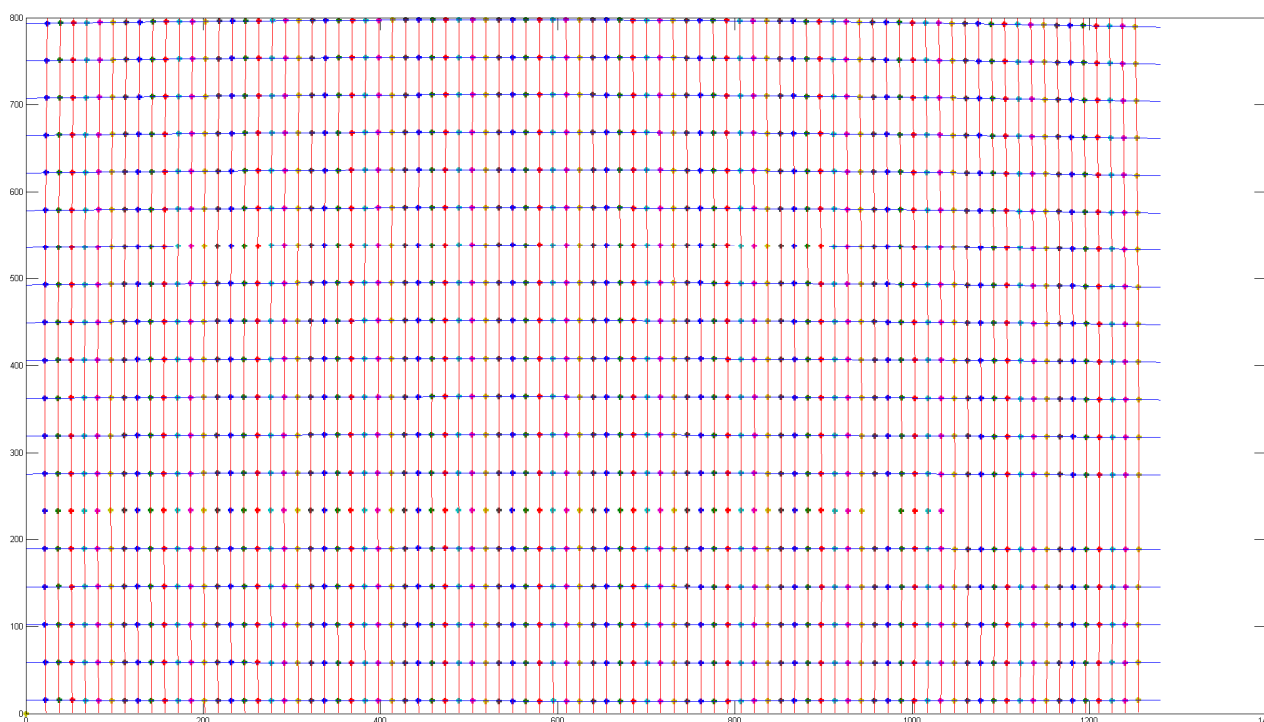

**Figure S1.** Distortion\_Map\_XJ-M255\_overall.

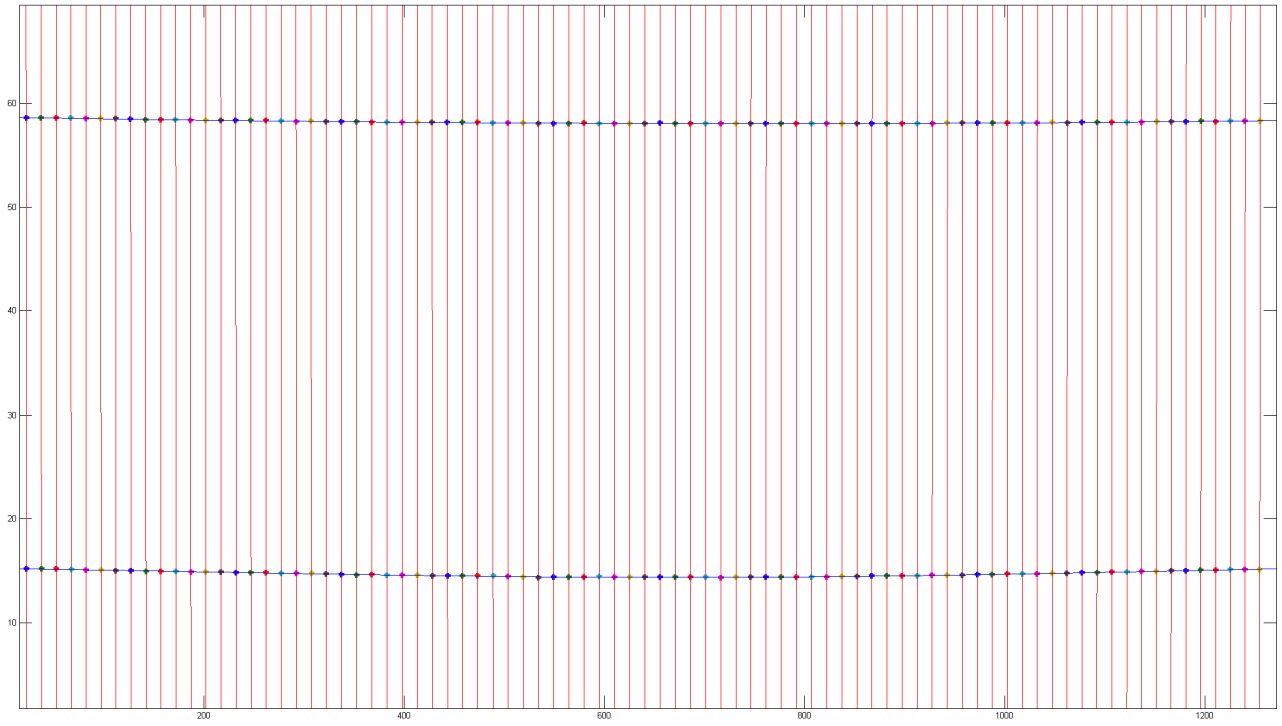

**Figure S2.** Distortion\_Map\_XJ-M255\_bottom.

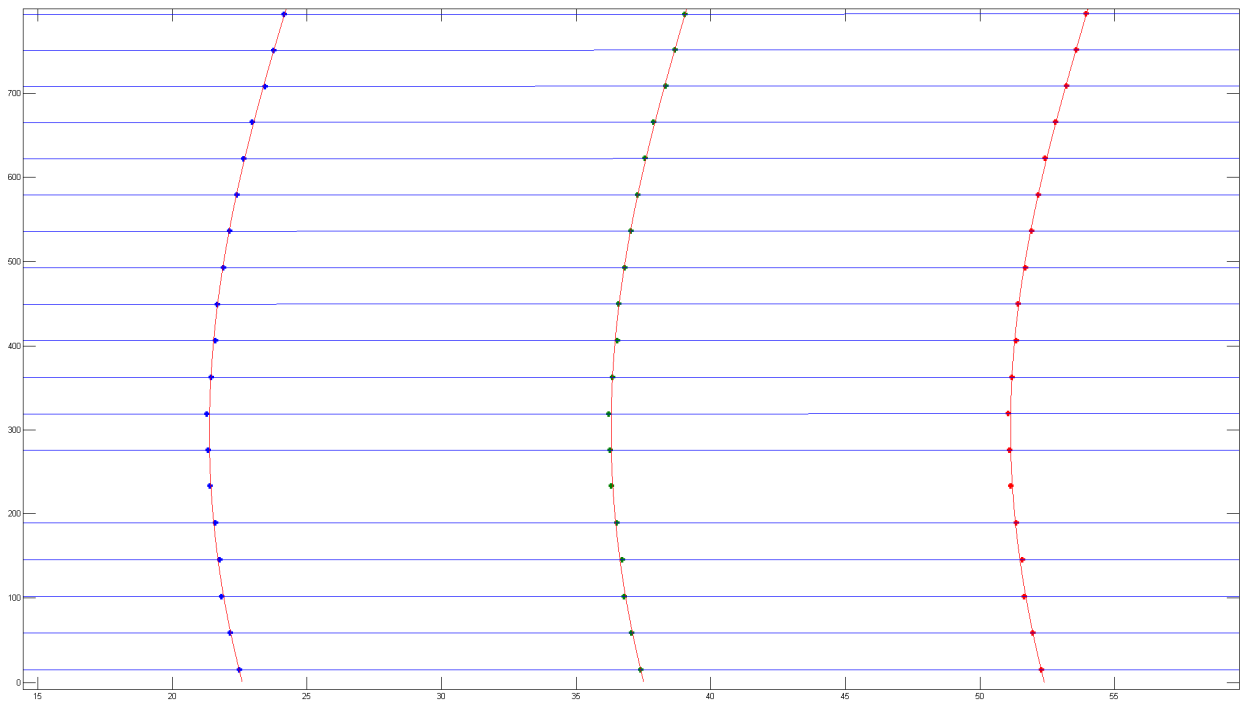

**Figure S3.** Distortion\_Map\_XJ-M255\_left.

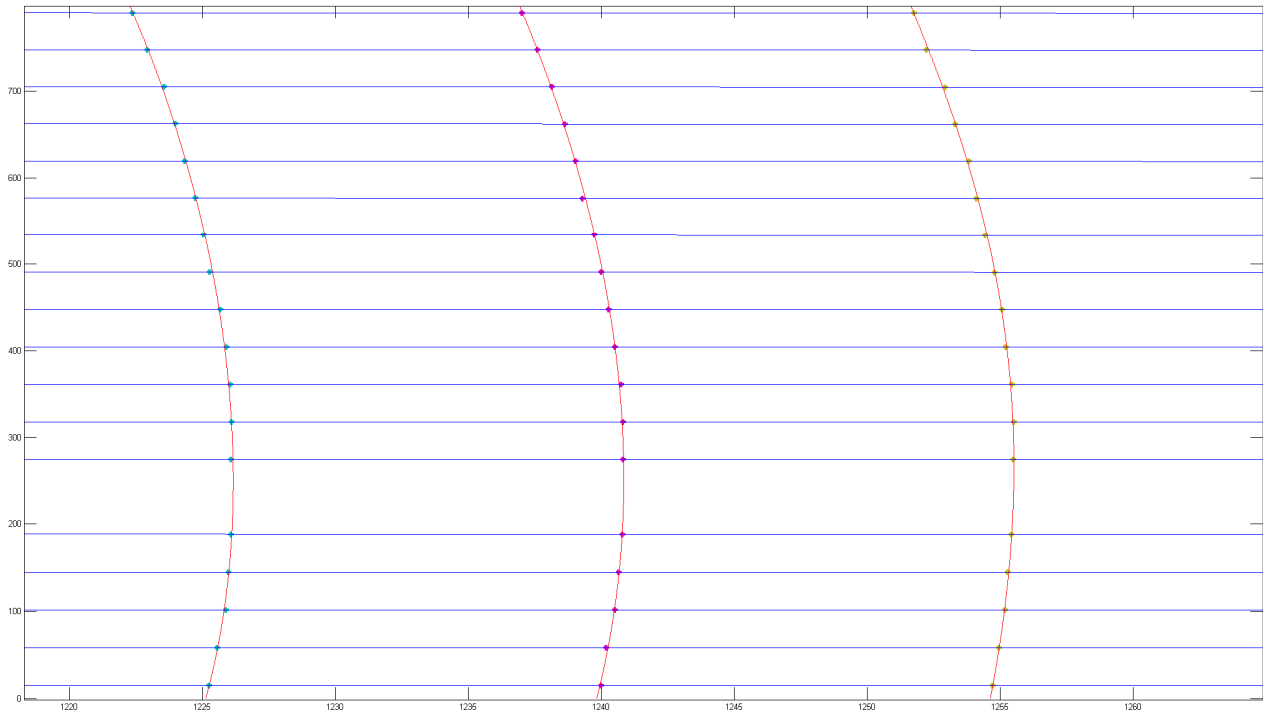

**Figure S4.** Distortion\_Map\_XJ-M255\_right.

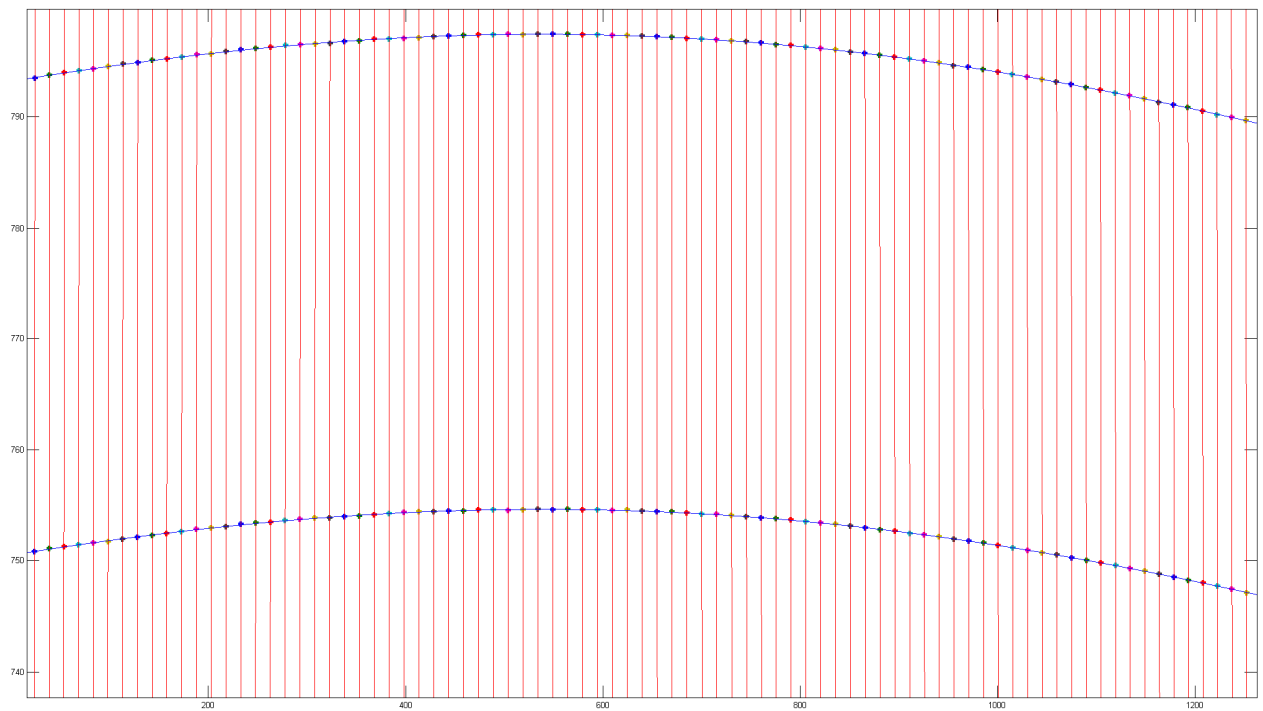

**Figure S5.** Distortion\_Map\_XJ-M255\_top.
